# Supplementary material for: Development and initial validation of a fertility experiences questionnaire
Source: PubMed Central journal article supplement (PMC4504457; doi:10.1186/s12978-015-0054-3), 2015-07-17
Supplement: 12978_2015_54_MOESM1_ESM.pdf [file 12978_2015_54_MOESM1_ESM.pdf]

## **Fertility Experiences Woman's Questionnaire**

**This file includes the written (online or paper) portion of the Fertility Experiences Questionnaire (pages 1-18), followed by the telephone interview portion of the questionnaire (pages 19-29). Those items that were assessed independently in the medical record review are highlighted and appear on pages 5 and 6 of the written portion and pages 2,3,5,6,7 of the telephone interview (pages 20,21,23,24,25 of the overall document).**

### **The Purpose of the Study of Fertility Experiences**

Thank you for your participation in this study! We appreciate your willingness to participate in this important research. This questionnaire is part of a study to assess the experiences of couples about getting pregnant or not getting pregnant. We are studying whether fertility treatments were used and important outcomes of any pregnancies that happened.

Online version only] This questionnaire is administered with secure computing standards to ensure your privacy. Only authorized study personnel will have access to your responses. All answers are completely confidential.

This study is being conducted through the Department of Family and Preventive Medicine at the University of Utah, Salt Lake City, Utah. The Principal Investigator is Dr. Joseph Stanford. He can be reached at 801-587-3331 or joseph.stanford@utah.edu. If you have questions regarding your rights as a research participant, or if problems arise which you do not feel you can discuss with the Investigator, please contact the Institutional Review Board Office at the University of Utah, at 801-581-3655.

### **Instructions for Completing the Questionnaire**

Please take your time as you answer the following questions. Be as accurate as you can, but feel free to make your best guess if you are unsure of the exact answer.

[Paper version only] Please send your completed questionnaire to [name] at [name]@utah.edu, you can fax it to [fax number], or you can mail it to [name], Division of Public Health, University of Utah, 375 Chipeta Way Suite A, Salt Lake City, UT 84108. If you have any questions or comments please talk to [name], Study Coordinator.

[Online version only] When you are done with a set of questions on the screen, click on the "Next" button to continue. If you want to go back to a previous screen and change your answers, click the "Previous" button. If you want to save your responses and come back later to finish the questionnaire, please click the "Save and Return Later" button. When you click this button, please type in your email so that a return ticket may be sent to you. The return

## Fertility Experiences Written Questionnaire

ticket is a code that will allow you to retrieve your incomplete questionnaire and finish it. Once you complete the questionnaire, please click the "Submit" button.

## Fertility Experiences Woman's Questionnaire

Study ID# \_\_\_\_\_

Initials of your first and last name: \_\_\_\_\_

Today's Date |\_\_| |\_\_| |\_\_| / |\_\_| |\_\_| / |\_\_| |\_\_| |\_\_| (example: Mar / 17 / 2005)  
Month / Day / Year

### A. General Health

(A-01) How tall are you? |\_\_|ft |\_\_|in | (example: 5 ft/ 3 in)

(A-02) How much do you weigh? \_\_\_\_\_ lbs (example: 118 lbs)

(A-03) On how many of the past 7 days did you exercise or participate in sports activities for at least 20 minutes that made you SWEAT and BREATHE HARD, such as fast walking, jogging, swimming laps, playing tennis, fast bicycling, heavy yard work or housework, or similar aerobic activities? Please mark  one.

0     1     2     3     4     5     6     7     Prefer not to answer

(A-04) On how many of the past 7 days did you exercise or participate in sports activities for at least 20 minutes but less vigorously than described above? Please mark  one.

0     1     2     3     4     5     6     7     Prefer not to answer

(A-05) In a typical week, how many days on average do you exercise or participate in sports activities for at least 20 minutes that made you SWEAT and BREATHE HARD, such as fast walking, jogging, swimming laps, playing tennis, fast bicycling, heavy yard work or housework, or similar aerobic activities? Please mark  one.

0     1     2     3     4     5     6     7     Prefer not to answer

(A-06) In a typical week, how many days on average do you exercise or participate in sports activities for at least 20 minutes but less vigorously than described above? Please mark  one.

0     1     2     3     4     5     6     7     Prefer not to answer

(A-07) Have you smoked at least 100 cigarettes in your entire life (100 cigarettes = 5 packs)?

Yes     No     Don't Know/Not Sure     Prefer not to answer

→ If **no**, please skip to question A-11 below

(A-08) Do you now smoke cigarettes every day, some days, or not at all?

Every Day     Some Days     Not at all     Don't Know/Not Sure     Prefer not to answer

(A-09) During the past 12 months, have you stopped smoking for one day or longer because you were trying to quit smoking?

Yes     No     Don't Know/Not Sure     Prefer not to answer

(A-10) How long has it been since you last smoked cigarettes regularly?

- Within the past month (less than 1 month ago)  
 Within the past 3 months (1 month but less than 3 months ago)  
 Within the past 6 months (3 months but less than 6 months ago)  
 Within the past year (6 months but less than 1 year ago)  
 Within the past 5 years (1 year but less than 5 years ago)  
 Within the past 10 years (5 years but less than 10 years ago)  
 10 years or more



## Fertility Experiences Written Questionnaire

**B. Menstrual History**

**For this section, please describe the menstrual periods you have had when not taking any hormones (birth control pills or Provera) or any fertility treatments (Clomid or fertility shots).**

(B-01) At what age did you have your first menstrual period? \_\_\_\_\_ (Age)  
 Prefer not to answer

(B-02) Your menstrual period almost always comes about monthly.  
 Yes     No     Prefer not to answer

(B-03) Your menstrual period is usually the same length and heaviness each time.  
 Yes     No     Prefer not to answer

(B-04) Your menstrual period lasts at least three days.  
 Yes     No     Prefer not to answer

→ If **yes** to Questions B-02, B-03, and B-04, please skip to Section C

(B-05) What is the usual number of periods you might expect in one year? (Please mark  one)  
 0-1     2-4     5-7     8-10     Other, please specify \_\_\_\_\_ (Number)  
 Prefer not to answer

(B-06) Your period flow is: (Please mark  one)  
 Often different one period to the next     Very light     About normal     Very heavy     Other  
 Prefer not to answer

(B-07) The length of your period is: (Please mark  one)  
 Often different one period to the next     <5 days     5-10 days     >10 days     Other  
 Prefer not to answer

**C. Sexual History**

**The next few questions will ask about items of your sexual health history that can have an impact on your fertility.**

(C-01) How many sexual partners have you had over the course of your lifetime? \_\_\_\_\_ (Number)  
 Prefer not to answer

(C-02) Have you ever been diagnosed with any of the following?

|                                               |                              |                             |                                 |
|-----------------------------------------------|------------------------------|-----------------------------|---------------------------------|
| Chlamydia                                     | <input type="checkbox"/> Yes | <input type="checkbox"/> No | <input type="checkbox"/> Unsure |
| Gonorrhea                                     | <input type="checkbox"/> Yes | <input type="checkbox"/> No | <input type="checkbox"/> Unsure |
| Pelvic inflammatory disease                   | <input type="checkbox"/> Yes | <input type="checkbox"/> No | <input type="checkbox"/> Unsure |
| Any other sexually transmitted infection      | <input type="checkbox"/> Yes | <input type="checkbox"/> No | <input type="checkbox"/> Unsure |
| <input type="checkbox"/> Prefer not to answer |                              |                             |                                 |

## Fertility Experiences Written Questionnaire

**D. Pregnancies and “Attempts” to Conceive**

The next set of questions will ask about your pregnancies and all “attempts” to conceive, whether or not these attempts actually resulted in a pregnancy.

For the purpose of the rest of the questionnaire, “attempt” to conceive means any period of time lasting more than one month when you were having sexual intercourse with a male partner without using any method to prevent pregnancy. We will call that an “attempt” to conceive even if you were not doing anything else to try to get pregnant.

Each “attempt” to conceive could start in one of three ways:

- 1) you began to have sexual intercourse and did not use any method to prevent pregnancy
- 2) you were already having sexual intercourse, and you stopped using any method to prevent pregnancy
- 3) you started having sex again after a pregnancy ended and were not using any method to prevent pregnancy

Each “attempt” to conceive could end in one of three ways

- 1) you became pregnant
- 2) you started using any method to prevent pregnancy
- 3) you stopped having sexual intercourse with your partner at that time

Here is an example:

First attempt:

- Woman gets married in January 2000 and starts using birth control pills until January 2001
- Attempt BEGINS January 2001 when woman stops using birth control
- Attempt ENDS in September 2001 when her husband was called to active military duty

Second attempt:

- Attempt BEGINS when her husband returns from active duty September 2002 and woman is not on birth control
- Because she was not getting pregnant, she saw a doctor and got medication in March 2004
- Attempt ENDS in September 2004 when she got pregnant

Third attempt:

- Woman had miscarriage in October 2004 and couple decide to use condoms for a few months
- Attempt BEGINS in December 2004 when couple stops using condoms
- Attempt ENDS in December 2006 when doctor advises woman to use birth control pills for medical reasons

(D-01) How many times have you ever been pregnant, counting all pregnancies at all times in your life, regardless of the outcome? \_\_\_\_\_ (Number)

Prefer not to answer

→ If you have never been pregnant, please skip to Question D-05.

(D-02) How many pregnancies resulted from attempts to conceive, as defined above? \_\_\_\_\_ (Number)

Prefer not to answer

(D-03) How many pregnancies resulted when you were using a method to prevent pregnancy (any method, regardless of how consistently it was used)? \_\_\_\_\_ (Number)

Prefer not to answer

(D-04) Did you have any pregnancies that did not fit into any of the above categories?

Yes       No       Prefer not to answer

If yes, please explain: \_\_\_\_\_

(D-05) In your lifetime, how many different “attempts” to conceive have you had? In other words, how many periods of time in your life did you have intercourse without using any method to prevent pregnancy (whether or not a pregnancy occurred)?

Fertility Experiences Written Questionnaire

\_\_\_\_\_ (Number)

Prefer not to answer

(D-06) These next questions are about **all** your “attempts” to conceive.

|                                      |                                                                                                                                                                                                        |                                    |                                                                                                | Answer These Columns<br>if “Attempt” Ended in Pregnancy                                                                                                                              |                                        |                                                     |  |
|--------------------------------------|--------------------------------------------------------------------------------------------------------------------------------------------------------------------------------------------------------|------------------------------------|------------------------------------------------------------------------------------------------|--------------------------------------------------------------------------------------------------------------------------------------------------------------------------------------|----------------------------------------|-----------------------------------------------------|--|
| “Attempt”<br>Begin Date<br>(mm/yyyy) | How “attempt”<br>ended:<br>1: Pregnancy<br>2: Started Method<br>to Avoid<br>Pregnancy<br>3: Illness<br>4: Separation or<br>Living Apart<br>5: Divorce<br>6: Abstaining<br>7: Currently Still<br>Trying | “Attempt” End<br>Date<br>(mm/yyyy) | Date Pregnancy<br>Ended<br>(mm/yyyy)<br>If currently still<br>pregnant,<br>please enter<br>888 | Pregnancy<br>Outcome:<br>1: Live Birth<br>2: Miscarriage<br>3: Ectopic<br>Pregnancy<br>4: Stillbirth<br>5: Molar Pregnancy<br>6: Termination<br>7: Currently<br>pregnant<br>8: Other | Name of<br>Baby (if<br>applicabl<br>e) | State<br>Where Birth<br>Occurred (if<br>applicable) |  |
| 1                                    |                                                                                                                                                                                                        |                                    |                                                                                                |                                                                                                                                                                                      |                                        |                                                     |  |
| 2                                    |                                                                                                                                                                                                        |                                    |                                                                                                |                                                                                                                                                                                      |                                        |                                                     |  |
| 3                                    |                                                                                                                                                                                                        |                                    |                                                                                                |                                                                                                                                                                                      |                                        |                                                     |  |
| 4                                    |                                                                                                                                                                                                        |                                    |                                                                                                |                                                                                                                                                                                      |                                        |                                                     |  |
| 5                                    |                                                                                                                                                                                                        |                                    |                                                                                                |                                                                                                                                                                                      |                                        |                                                     |  |
| 6                                    |                                                                                                                                                                                                        |                                    |                                                                                                |                                                                                                                                                                                      |                                        |                                                     |  |
| 7                                    |                                                                                                                                                                                                        |                                    |                                                                                                |                                                                                                                                                                                      |                                        |                                                     |  |
| 8                                    |                                                                                                                                                                                                        |                                    |                                                                                                |                                                                                                                                                                                      |                                        |                                                     |  |
| 9                                    |                                                                                                                                                                                                        |                                    |                                                                                                |                                                                                                                                                                                      |                                        |                                                     |  |
| 10                                   |                                                                                                                                                                                                        |                                    |                                                                                                |                                                                                                                                                                                      |                                        |                                                     |  |
| 11                                   |                                                                                                                                                                                                        |                                    |                                                                                                |                                                                                                                                                                                      |                                        |                                                     |  |
| 12                                   |                                                                                                                                                                                                        |                                    |                                                                                                |                                                                                                                                                                                      |                                        |                                                     |  |
| 13                                   |                                                                                                                                                                                                        |                                    |                                                                                                |                                                                                                                                                                                      |                                        |                                                     |  |
| 14                                   |                                                                                                                                                                                                        |                                    |                                                                                                |                                                                                                                                                                                      |                                        |                                                     |  |
| 15                                   |                                                                                                                                                                                                        |                                    |                                                                                                |                                                                                                                                                                                      |                                        |                                                     |  |

Prefer not to answer

**Note: During our telephone interview, we will be asking you some more detailed questions about these attempts.**

**E. Previous Medical Evaluations**

The next few questions will ask you about any previous fertility-related evaluations you may have had.

| Question                                                                                        | Answer                                                                                      | Result                                                                                                                                                                    |
|-------------------------------------------------------------------------------------------------|---------------------------------------------------------------------------------------------|---------------------------------------------------------------------------------------------------------------------------------------------------------------------------|
| (E-01) Have you had an ultrasound of the uterus and ovaries?                                    | <input type="checkbox"/> Yes <input type="checkbox"/> No<br><input type="checkbox"/> Unsure | <input type="checkbox"/> Normal <input type="checkbox"/> Abnormal <input type="checkbox"/> Unsure<br><input type="checkbox"/> Not applicable/did not have this evaluation |
| (E-02) Have you had an ultrasound scan of the ovaries to look at ovulation (follicle tracking)? | <input type="checkbox"/> Yes <input type="checkbox"/> No<br><input type="checkbox"/> Unsure | <input type="checkbox"/> Normal <input type="checkbox"/> Abnormal <input type="checkbox"/> Unsure<br><input type="checkbox"/> Not applicable/did not have this evaluation |
| (E-03) Have you had a hysterosalpingogram (x-ray assessment of the uterus and fallopian tubes)? | <input type="checkbox"/> Yes <input type="checkbox"/> No<br><input type="checkbox"/> Unsure | <input type="checkbox"/> Normal <input type="checkbox"/> Abnormal <input type="checkbox"/> Unsure<br><input type="checkbox"/> Not applicable/did not have this evaluation |
| (E-04) Have you had a hysteroscopy (camera visualization of uterine cavity)?                    | <input type="checkbox"/> Yes <input type="checkbox"/> No<br><input type="checkbox"/> Unsure | <input type="checkbox"/> Normal <input type="checkbox"/> Abnormal <input type="checkbox"/> Unsure<br><input type="checkbox"/> Not applicable/did not have this evaluation |
| (E-05) Have you had an endometrial biopsy (small tissue sample is taken from uterus)?           | <input type="checkbox"/> Yes <input type="checkbox"/> No<br><input type="checkbox"/> Unsure | <input type="checkbox"/> Normal <input type="checkbox"/> Abnormal <input type="checkbox"/> Unsure<br><input type="checkbox"/> Not applicable/did not have this evaluation |

Fertility Experiences Written Questionnaire

|                                                                                                     |                                                                                             |                                                                                                                                                                           |
|-----------------------------------------------------------------------------------------------------|---------------------------------------------------------------------------------------------|---------------------------------------------------------------------------------------------------------------------------------------------------------------------------|
| (E-06) Have you had a D&C (scraping of lining of the womb)?                                         | <input type="checkbox"/> Yes <input type="checkbox"/> No<br><input type="checkbox"/> Unsure | <input type="checkbox"/> Normal <input type="checkbox"/> Abnormal <input type="checkbox"/> Unsure<br><input type="checkbox"/> Not applicable/did not have this evaluation |
| (E-07) Have you had a post-coital test (looking at sperm taken from your cervix after intercourse)? | <input type="checkbox"/> Yes <input type="checkbox"/> No<br><input type="checkbox"/> Unsure | <input type="checkbox"/> Normal <input type="checkbox"/> Abnormal <input type="checkbox"/> Unsure<br><input type="checkbox"/> Not applicable/did not have this evaluation |
| (E-08) Have you had day 3 or early cycle blood tests?                                               | <input type="checkbox"/> Yes <input type="checkbox"/> No<br><input type="checkbox"/> Unsure | <input type="checkbox"/> Normal <input type="checkbox"/> Abnormal <input type="checkbox"/> Unsure<br><input type="checkbox"/> Not applicable/did not have this evaluation |
| (E-09) Have you had day 21 or late cycle blood tests (progesterone or ovulation)?                   | <input type="checkbox"/> Yes <input type="checkbox"/> No<br><input type="checkbox"/> Unsure | <input type="checkbox"/> Normal <input type="checkbox"/> Abnormal <input type="checkbox"/> Unsure<br><input type="checkbox"/> Not applicable/did not have this evaluation |
| (E-10) Have you ever had blood tests for hormone levels related to your fertility?                  | <input type="checkbox"/> Yes <input type="checkbox"/> No<br><input type="checkbox"/> Unsure | <input type="checkbox"/> Normal <input type="checkbox"/> Abnormal <input type="checkbox"/> Unsure<br><input type="checkbox"/> Not applicable/did not have this evaluation |
| (E-11) Have you had a saliva hormone test related to your fertility?                                | <input type="checkbox"/> Yes <input type="checkbox"/> No<br><input type="checkbox"/> Unsure | <input type="checkbox"/> Normal <input type="checkbox"/> Abnormal <input type="checkbox"/> Unsure<br><input type="checkbox"/> Not applicable/did not have this evaluation |

**F. Previous Abdominal or Pelvic Surgeries**

(F-01) Which of the following surgeries have you had?

| Yes | No | Surgery                                                                                                  | How many times? | Date(s) of Surgery (mm/yyyy) |
|-----|----|----------------------------------------------------------------------------------------------------------|-----------------|------------------------------|
|     |    | Caesarean Section (C-Section)                                                                            |                 |                              |
|     |    | Cervical cryotherapy or LEEP (freezing or surgery of the cervix to treat an abnormal pap smear)          |                 |                              |
|     |    | Cautery, or laser treatment for endometriosis                                                            |                 |                              |
|     |    | Wedge resection or ovarian drilling for polycystic ovaries                                               |                 |                              |
|     |    | Laparoscopy (looking in the abdomen or pelvis with a camera)                                             |                 |                              |
|     |    | Laparotomy, or major abdominal or pelvic surgery where an incision is made (does not include C-sections) |                 |                              |
|     |    | Ovarian cystectomy, or removal of ovarian cyst                                                           |                 |                              |
|     |    | Myomectomy, or removal of fibroid tumors                                                                 |                 |                              |
|     |    | Polypectomy, or removal of polyps                                                                        |                 |                              |
|     |    | Tubal Ligation ("tubes tied")                                                                            |                 |                              |
|     |    | Tubal Reconstruction (microsurgery)                                                                      |                 |                              |
|     |    | Other Abdominal or Pelvic Surgery, please describe:                                                      |                 |                              |

Prefer not to answer

(F-02) Which of the following surgeries has your partner had?

| Yes | No | Surgery                                         | Date(s) of Surgery (mm/yyyy) |
|-----|----|-------------------------------------------------|------------------------------|
|     |    | Vasectomy                                       |                              |
|     |    | Vasectomy reversal                              |                              |
|     |    | Other urologic surgery<br>Please explain: _____ |                              |

Prefer not to answer

Fertility Experiences Written Questionnaire

**G. Previous Diagnoses**

**Have you or your partner ever been told you have or suspect that you might have:**

(G-01) Unexplained infertility  
 Yes       No       Unsure       Prefer not to answer

(G-02) Endometriosis  
 Yes       No       Unsure       Prefer not to answer

(G-03) Polycystic ovaries (PCOD, PCOS)  
 Yes       No       Unsure       Prefer not to answer

(G-04) Low progesterone  
 Yes       No       Unsure       Prefer not to answer

(G-05) Low estrogen  
 Yes       No       Unsure       Prefer not to answer

(G-06) Not ovulating  
 Yes       No       Unsure       Prefer not to answer

(G-07) Abnormal ovulation  
 Yes       No       Unsure       Prefer not to answer

(G-08) Hostile or limited cervical mucus  
 Yes       No       Unsure       Prefer not to answer

(G-9) Pelvic adhesions or scar tissue  
 Yes       No       Unsure       Prefer not to answer

(G-10) Blocked or damaged fallopian tubes  
 Yes       No       Unsure       Prefer not to answer

(G-11) Fibroids in or on the uterus  
 Yes       No       Unsure       Prefer not to answer

(G-12) Polyps in the uterus  
 Yes       No       Unsure       Prefer not to answer

(G-13) Luteinized unruptured follicle (LUF)  
 Yes       No       Unsure       Prefer not to answer

(G-14) Luteal Phase Defect?  
 Yes       No       Unsure       Prefer not to answer

(G-15) Male factor infertility or sperm abnormality  
 Yes       No       Unsure       Prefer not to answer

(G-16) Any other health issues that may be related to your fertility?  
 Yes       No       Prefer not to answer

If **yes**, please specify: \_\_\_\_\_



## Fertility Experiences Written Questionnaire

**H. Previous Fertility Treatment**

**These next questions are about fertility-enhancing drugs that may be taken by mouth or by injection.**

(H-01) Have you ever been advised by a physician or practitioner to try any fertility-enhancing drugs, such as Clomid, clomiphene, perganol, Follistim, or others?

- Yes       No       Prefer not to answer

(H-02) Have you ever used any fertility-enhancing drugs?

- Yes       No       Prefer not to answer

(H-03) If you answered **yes** to Question H-02: Did you stop treatment when your doctor still recommended continuing it?

- Yes       No       Prefer not to answer

(H-04) If you answered **yes** to Question H-03: Why did you stop treatment? Please mark  all that apply.

- My beliefs       My partner's beliefs       My family's beliefs  
 Insurance coverage       My job       Distance to clinic too great  
 Lack of transportation       Felt treatment was not safe enough for me and my future baby  
 Concern about procedure       Did not feel ready  
 Wanted to try other forms of treatment  
 Felt that getting pregnant was impossible  
 Felt that treatment wasn't working       Did not know where to go for help  
 Life was too busy  
 Thought that a pregnancy would happen eventually  
 There was a change in my relationship to my partner  
 Got pregnant       Physically drained  
 Money       Other demands  
 Don't know       Other, please describe: \_\_\_\_\_  
 Prefer not to answer

(H-05) If you answered **yes** to question H-01 and **yes** to question H-02:

Why did you use fertility-enhancing drugs? Please mark  all that apply.

- Treatment was ethically acceptable to me  
 Treatment was ethically acceptable to my partner  
 Treatment was ethically acceptable to my family  
 Insurance covered procedure       My job allowed me flexibility  
 Clinic was easily accessible       My doctor recommended it  
 Felt treatment was safe enough to use for me and the baby  
 Minimal concern about procedure       Felt that the treatment was likely to work  
 Felt ready       Cost of procedure was not too great for me  
 Not applicable       Don't know  
 Other, please describe: \_\_\_\_\_  
 Prefer not to answer

(H-06) If you answered **yes** to question H-01 and **no** to question H-02:

Why did you not use any fertility-enhancing drugs? Please mark  all that apply.

- My beliefs       My partner's beliefs       My family's beliefs  
 Insurance coverage       My job       Distance to clinic too great  
 Lack of transportation       Felt treatment was not safe enough for me and my future baby  
 Concern about procedure       Did not feel ready  
 Wanted to try other forms of treatment  
 Felt that getting pregnant was impossible  
 Felt that treatment wouldn't work  
 Did not know where to go for help       Life was so busy, this never became a priority  
 Thought that a pregnancy would happen eventually  
 Got pregnant       Physically drained  
 Money       Other demands  
 Don't know       Other, please describe: \_\_\_\_\_  
 Prefer not to answer

## Fertility Experiences Written Questionnaire

**These next questions are about artificial insemination, either with your partner's sperm or with donor sperm.**

(H-07) Have you ever been advised by a physician or practitioner to try artificial insemination?

- Yes       No       Prefer not to answer

(H-08) Have you ever attempted artificial insemination?

- Yes       No       Prefer not to answer

(H-09) If you answered **yes** to Question H-08: Did you stop treatment when your doctor still recommended it?

- Yes       No       Prefer not to answer

(H-10) If you answered **yes** to Question H-09: Why did you stop treatment? Please mark  all that apply.

- My beliefs       My partner's beliefs       My family's beliefs  
 Insurance coverage       My job       Distance to clinic too great  
 Lack of transportation       Felt treatment was not safe enough for me and my future baby  
 Concern about procedure       Did not feel ready  
 Wanted to try other forms of treatment  
 Felt that getting pregnant was impossible  
 Felt that treatment wasn't working       Did not know where to go for help  
 Life was too busy  
 Thought that a pregnancy would happen eventually  
 There was a change in my relationship to my partner  
 Got pregnant       Physically drained  
 Money       Other demands  
 Don't know       Other, please describe: \_\_\_\_\_  
 Prefer not to answer

(H-12) If you answered **yes** to question H-07 and **yes** to question H-08:

Why did you use artificial insemination? Please mark  all that apply.

- Treatment was ethically acceptable to me  
 Treatment was ethically acceptable to my partner  
 Treatment was ethically acceptable to my family  
 Insurance covered procedure       My job allowed me flexibility  
 Clinic was easily accessible       My doctor recommended it  
 Felt treatment was safe enough to use for me and the baby  
 Minimal concern about procedure       Felt that the treatment was likely to work  
 Felt ready       Cost of procedure was not too great for me  
 Not applicable       Don't know  
 Other, please describe: \_\_\_\_\_  
 Prefer not to answer

(H-13) If you answered **yes** to question H-07 and **no** to question H-08:

Why did you not use artificial insemination? Please mark  all that apply.

- My beliefs       My partner's beliefs       My family's beliefs  
 Insurance coverage       My job       Distance to clinic too great  
 Lack of transportation       Felt treatment was not safe enough for me and my future baby  
 Concern about procedure       Did not feel ready  
 Wanted to try other forms of treatment  
 Felt that getting pregnant was impossible  
 Felt that treatment wouldn't work  
 Did not know where to go for help       Life was so busy, this never became a priority  
 Thought that a pregnancy would happen eventually  
 Got pregnant       Physically drained  
 Money       Other demands  
 Don't know       Other, please describe: \_\_\_\_\_  
 Prefer not to answer

## Fertility Experiences Written Questionnaire

**These next questions are about in-vitro fertilization (IVF) or similar ART treatments, such as intra-cytoplasmic sperm injection (ICSI), gamete intra-fallopian transfer (GIFT), or zygote intra-fallopian transfer (ZIFT). By ART treatment, we mean any treatment that involves removing the egg from the woman's body and then replacing the egg or embryo back into the body.**

(H-14) Have you ever been advised by a physician or practitioner to try IVF, ICSI, or any other ART.

- Yes       No       Prefer not to answer

(H-15) Have you ever attempted IVF, ICSI or any other ART.

- Yes       No       Prefer not to answer

(H-16) If you answered **yes** to Question H-15: Did you stop treatment when your doctor still recommended continuing it?

- Yes       No       Prefer not to answer

(H-17) If you answered **yes** to Question H-16: Why did you stop treatment? Please mark  all that apply.

- My beliefs       My partner's beliefs       My family's beliefs  
 Insurance coverage       My job       Distance to clinic too great  
 Lack of transportation       Felt treatment was not safe enough for me and my future baby  
 Concern about procedure       Did not feel ready  
 Wanted to try other forms of treatment  
 Felt that getting pregnant was impossible  
 Felt that treatment wasn't working       Did not know where to go for help  
 Life was too busy  
 Thought that a pregnancy would happen eventually  
 There was a change in my relationship to my partner  
 Got pregnant       Physically drained  
 Money       Other demands  
 Don't know       Other, please describe: \_\_\_\_\_  
 Prefer not to answer

(H-18) If you answered **yes** to question H-14 and **yes** to question H-15:

Why did you use IVF, ICSI, or any other ART? Please mark  all that apply.

- Treatment was ethically acceptable to me  
 Treatment was ethically acceptable to my partner  
 Treatment was ethically acceptable to my family  
 Insurance covered procedure       My job allowed me flexibility  
 Clinic was easily accessible       My doctor recommended it  
 Felt treatment was safe enough to use for me and the baby  
 Minimal concern about procedure       Felt that the treatment was likely to work  
 Felt ready       Cost of procedure was not too great for me  
 Not applicable       Don't know  
 Other, please describe: \_\_\_\_\_  
 Prefer not to answer

(H-19) If you answered **yes** to question H-14 and **no** to question H-15:

Why did you not use any fertility-enhancing drugs? Please mark  all that apply.

- My beliefs       My partner's beliefs       My family's beliefs  
 Insurance coverage       My job       Distance to clinic too great  
 Lack of transportation       Felt treatment was not safe enough for me and my future baby  
 Concern about procedure       Did not feel ready  
 Wanted to try other forms of treatment  
 Felt that getting pregnant was impossible  
 Felt that treatment wouldn't work       Life was so busy, this never became a priority  
 Did not know where to go for help  
 Thought that a pregnancy would happen eventually  
 Got pregnant       Physically drained  
 Money       Other demands

## Fertility Experiences Written Questionnaire

- Don't know  Other, please describe: \_\_\_\_\_  
 Prefer not to answer

**These next questions are about alternative fertility treatments. These may include acupuncture, herbal remedies, fertility diets, etc.**

(H-20) Have you ever been advised by a physician or practitioner to try alternative fertility treatments (acupuncture, herbal remedies, fertility diets, etc)?

- Yes  No  Prefer not to answer

(H-21) Have you ever attempted any alternative fertility treatments?

- Yes  No  Prefer not to answer

(H-22) If you answered **yes** to Question H-21: Did you stop treatment when your doctor still recommended continuing it?

- Yes  No  Prefer not to answer

(H-23) If you answered **yes** to Question H-22: Why did you stop treatment? Please mark  all that apply.

- My beliefs  My partner's beliefs  My family's beliefs  
 Insurance coverage  My job  Distance to clinic too great  
 Lack of transportation  Felt treatment was not safe enough for me and my future baby  
 Concern about procedure  Did not feel ready  
 Wanted to try other forms of treatment  
 Felt that getting pregnant was impossible  
 Felt that treatment wasn't working  Did not know where to go for help  
 Life was too busy  
 Thought that a pregnancy would happen eventually  
 There was a change in my relationship to my partner  
 Got pregnant  Physically drained  
 Money  Other demands  
 Don't know  Other, please describe: \_\_\_\_\_  
 Prefer not to answer

(H-24) If you answered **yes** to question H-21:

Why did you use alternative fertility treatment? Please mark  all that apply.

- Treatment was ethically acceptable to me  
 Treatment was ethically acceptable to my partner  
 Treatment was ethically acceptable to my family  
 Insurance covered procedure  My job allowed me flexibility  
 Clinic was easily accessible  My doctor recommended it  
 Felt treatment was safe enough to use for me and the baby  
 Minimal concern about procedure  Felt that the treatment was likely to work  
 Felt ready  Cost of procedure was not too great for me  
 Not applicable  Don't know  
 Other, please describe: \_\_\_\_\_  
 Prefer not to answer

(H-25) If you answered **no** to question H-22:

Why did you not use alternative fertility treatment? Please mark  all that apply.

- My beliefs  My partner's beliefs  My family's beliefs  
 Insurance coverage  My job  Distance to clinic too great  
 Lack of transportation  Felt treatment was not safe enough for me and my future baby  
 Concern about procedure  Did not feel ready  
 Wanted to try other forms of treatment  
 Felt that getting pregnant was impossible  
 Felt that treatment wouldn't work  
 Did not know where to go for help  Life was so busy, this never became a priority  
 Thought that a pregnancy would happen eventually  
 Got pregnant  Physically drained  
 Money  Other demands

Fertility Experiences Written Questionnaire

- Don't know  
 Prefer not to answer

Other, please describe: \_\_\_\_\_

**I. Adoption**

(I-01) Have you ever applied for adoption?  
 Yes       No       Prefer not to answer

(I-02) Do you have any adopted children?  
 Yes       No       Prefer not to answer

(I-03) If you answered **yes** to (I-01) and **no** to (I-02):  
What was the reason you did not adopt children?

\_\_\_\_\_

Prefer not to answer

(I-04) Have you ever had foster children?  
 Yes       No       Prefer not to answer

(I-05) Do you currently have any foster children?  
 Yes       No       Prefer not to answer

(I-06) If you answered **yes** to (I-04) and **no** to (I-05):  
What was the reason you did not foster children?

\_\_\_\_\_

Prefer not to answer

**J. Stress and Social Situation**

**These next few questions are about how you or your partner's fertility problems and/or treatment have affected you.**

(J-01) With reference to you or your partner's fertility problems and/or treatment, do you feel that:  
[Please mark  one answer for each line]

|                                               | Strongly<br>Agree        | Agree                    | Neutral                  | Disagree                 | Strongly<br>Disagree     |
|-----------------------------------------------|--------------------------|--------------------------|--------------------------|--------------------------|--------------------------|
| My life has changed very much                 | <input type="checkbox"/> | <input type="checkbox"/> | <input type="checkbox"/> | <input type="checkbox"/> | <input type="checkbox"/> |
| My life has been disrupted as a result        | <input type="checkbox"/> | <input type="checkbox"/> | <input type="checkbox"/> | <input type="checkbox"/> | <input type="checkbox"/> |
| It has been stressful for me to deal with     | <input type="checkbox"/> | <input type="checkbox"/> | <input type="checkbox"/> | <input type="checkbox"/> | <input type="checkbox"/> |
| <input type="checkbox"/> Prefer not to answer |                          |                          |                          |                          |                          |

(J-02) How have you or your partner's fertility problems affected your marriage/partnership?  
[Please mark  one answer for each line]

|                                               | Strongly<br>Agree        | Agree                    | Neutral                  | Disagree                 | Strongly<br>Disagree     |
|-----------------------------------------------|--------------------------|--------------------------|--------------------------|--------------------------|--------------------------|
| Brought us closer together                    | <input type="checkbox"/> | <input type="checkbox"/> | <input type="checkbox"/> | <input type="checkbox"/> | <input type="checkbox"/> |
| Strengthened our relationship                 | <input type="checkbox"/> | <input type="checkbox"/> | <input type="checkbox"/> | <input type="checkbox"/> | <input type="checkbox"/> |
| Caused crisis in our relationship             | <input type="checkbox"/> | <input type="checkbox"/> | <input type="checkbox"/> | <input type="checkbox"/> | <input type="checkbox"/> |
| Caused thoughts of divorce                    | <input type="checkbox"/> | <input type="checkbox"/> | <input type="checkbox"/> | <input type="checkbox"/> | <input type="checkbox"/> |
| <input type="checkbox"/> Prefer not to answer |                          |                          |                          |                          |                          |

(J-03) How much stress has you or your partner's fertility problems placed on the following?  
[Please mark  one answer for each line]

|                           | A lot                    | Some                     | A little                 | None                     |
|---------------------------|--------------------------|--------------------------|--------------------------|--------------------------|
| Your marriage/partnership | <input type="checkbox"/> | <input type="checkbox"/> | <input type="checkbox"/> | <input type="checkbox"/> |

Fertility Experiences Written Questionnaire

|                                               |                          |                          |                          |                          |
|-----------------------------------------------|--------------------------|--------------------------|--------------------------|--------------------------|
| Your sex life                                 | <input type="checkbox"/> | <input type="checkbox"/> | <input type="checkbox"/> | <input type="checkbox"/> |
| Your relationships with your family           | <input type="checkbox"/> | <input type="checkbox"/> | <input type="checkbox"/> | <input type="checkbox"/> |
| Your relationships with your family-in-law    | <input type="checkbox"/> | <input type="checkbox"/> | <input type="checkbox"/> | <input type="checkbox"/> |
| Your relationships with friends               | <input type="checkbox"/> | <input type="checkbox"/> | <input type="checkbox"/> | <input type="checkbox"/> |
| Your relationships with workmates             | <input type="checkbox"/> | <input type="checkbox"/> | <input type="checkbox"/> | <input type="checkbox"/> |
| Your relationships to people with children    | <input type="checkbox"/> | <input type="checkbox"/> | <input type="checkbox"/> | <input type="checkbox"/> |
| Your relationships to pregnant women          | <input type="checkbox"/> | <input type="checkbox"/> | <input type="checkbox"/> | <input type="checkbox"/> |
| Your physical health                          | <input type="checkbox"/> | <input type="checkbox"/> | <input type="checkbox"/> | <input type="checkbox"/> |
| Your mental health                            | <input type="checkbox"/> | <input type="checkbox"/> | <input type="checkbox"/> | <input type="checkbox"/> |
| Your financial condition                      | <input type="checkbox"/> | <input type="checkbox"/> | <input type="checkbox"/> | <input type="checkbox"/> |
| <input type="checkbox"/> Prefer not to answer |                          |                          |                          |                          |

(J-04) Have you received support and understanding from any of the following people in relation to you or your partner's fertility problems or treatment? [Please mark  one answer for each line]

|                     | Always                   | Often                    | Sometimes                | Rarely                   | Never                    | Don't have               |
|---------------------|--------------------------|--------------------------|--------------------------|--------------------------|--------------------------|--------------------------|
| Family              | <input type="checkbox"/> | <input type="checkbox"/> | <input type="checkbox"/> | <input type="checkbox"/> | <input type="checkbox"/> | <input type="checkbox"/> |
| Partner             | <input type="checkbox"/> | <input type="checkbox"/> | <input type="checkbox"/> | <input type="checkbox"/> | <input type="checkbox"/> | <input type="checkbox"/> |
| Partner's Family    | <input type="checkbox"/> | <input type="checkbox"/> | <input type="checkbox"/> | <input type="checkbox"/> | <input type="checkbox"/> | <input type="checkbox"/> |
| Friends             | <input type="checkbox"/> | <input type="checkbox"/> | <input type="checkbox"/> | <input type="checkbox"/> | <input type="checkbox"/> | <input type="checkbox"/> |
| Colleagues          | <input type="checkbox"/> | <input type="checkbox"/> | <input type="checkbox"/> | <input type="checkbox"/> | <input type="checkbox"/> | <input type="checkbox"/> |
| Support Group       | <input type="checkbox"/> | <input type="checkbox"/> | <input type="checkbox"/> | <input type="checkbox"/> | <input type="checkbox"/> | <input type="checkbox"/> |
| Therapist/Counselor | <input type="checkbox"/> | <input type="checkbox"/> | <input type="checkbox"/> | <input type="checkbox"/> | <input type="checkbox"/> | <input type="checkbox"/> |
| Others              | <input type="checkbox"/> | <input type="checkbox"/> | <input type="checkbox"/> | <input type="checkbox"/> | <input type="checkbox"/> | <input type="checkbox"/> |

Who? \_\_\_\_\_  
 Prefer not to answer

(J-05) Have you experienced that some people react negatively to you or your partner's fertility problems or treatment? [Please mark  one answer for each line]

|                     | Always                   | Often                    | Sometimes                | Rarely                   | Never                    | Don't have               |
|---------------------|--------------------------|--------------------------|--------------------------|--------------------------|--------------------------|--------------------------|
| Family              | <input type="checkbox"/> | <input type="checkbox"/> | <input type="checkbox"/> | <input type="checkbox"/> | <input type="checkbox"/> | <input type="checkbox"/> |
| Partner             | <input type="checkbox"/> | <input type="checkbox"/> | <input type="checkbox"/> | <input type="checkbox"/> | <input type="checkbox"/> | <input type="checkbox"/> |
| Partner's Family    | <input type="checkbox"/> | <input type="checkbox"/> | <input type="checkbox"/> | <input type="checkbox"/> | <input type="checkbox"/> | <input type="checkbox"/> |
| Friends             | <input type="checkbox"/> | <input type="checkbox"/> | <input type="checkbox"/> | <input type="checkbox"/> | <input type="checkbox"/> | <input type="checkbox"/> |
| Colleagues          | <input type="checkbox"/> | <input type="checkbox"/> | <input type="checkbox"/> | <input type="checkbox"/> | <input type="checkbox"/> | <input type="checkbox"/> |
| Support Group       | <input type="checkbox"/> | <input type="checkbox"/> | <input type="checkbox"/> | <input type="checkbox"/> | <input type="checkbox"/> | <input type="checkbox"/> |
| Therapist/Counselor | <input type="checkbox"/> | <input type="checkbox"/> | <input type="checkbox"/> | <input type="checkbox"/> | <input type="checkbox"/> | <input type="checkbox"/> |
| Others              | <input type="checkbox"/> | <input type="checkbox"/> | <input type="checkbox"/> | <input type="checkbox"/> | <input type="checkbox"/> | <input type="checkbox"/> |

Who? \_\_\_\_\_  
 Prefer not to answer

**K. Experience of Past Fertility Treatment**

(K-01) Have you or your partner ever been evaluated or treated for fertility problems or miscarriage in the past?  
 Yes       No       Prefer not to answer

→ If **no**, please skip to Section L, Demographic Information

**In the next set of questions, please consider your overall experience with medical evaluation(s) and treatment(s) for infertility or miscarriage that you and your partner have had in the past. Please answer from your own perspective, not necessarily from your partner's perspective. This information will be kept completely confidential and will not be shared with your doctors.**

How do you assess the doctors and the staff that you have worked with?

(K-02) Did they make you feel you had enough time during the consultations? (Please mark  one)  
 Bad                                      Excellent

Fertility Experiences Written Questionnaire

1      2      3      4      5      Don't know/not relevant  
                 
 Prefer not to answer

(K-03) Did they involve you in decisions? (Please mark  one)

Bad      Excellent  
1      2      3      4      5      Don't know/not relevant  
                 
 Prefer not to answer

(K-04) Did they listen to you? (Please mark  one)

Bad      Excellent  
1      2      3      4      5      Don't know/not relevant  
                 
 Prefer not to answer

(K-05) Did they explain the purpose of examinations, tests, and treatments? (Please mark  one)

Bad      Excellent  
1      2      3      4      5      Don't know/not relevant  
                 
 Prefer not to answer

(K-06) Did they tell you what you wanted to know about the causes of infertility and/or miscarriage? (Please mark  one)

Bad      Excellent  
1      2      3      4      5      Don't know/not relevant  
                 
 Prefer not to answer

(K-07) Did they tell you what you wanted to know about the treatment of infertility and/or miscarriage? (Please mark  one)

Bad      Excellent  
1      2      3      4      5      Don't know/not relevant  
                 
 Prefer not to answer

(K-08) Did they deal with emotional consequences of your infertility or miscarriage and treatment? (Please mark  one)

Bad      Excellent  
1      2      3      4      5      Don't know/not relevant  
                 
 Prefer not to answer

(K-09) Did they make a treatment plan adjusted to your special situation? (Please mark  one)

Bad      Excellent  
1      2      3      4      5      Don't know/not relevant  
                 
 Prefer not to answer

(K-10) What have you liked most about you and your partner's past treatment?

---

---

---

 Prefer not to answer

(K-11) What have you liked least about you and your partner's past treatment?

Fertility Experiences Written Questionnaire

---



---



---

Prefer not to answer

(K-12) What is your overall satisfaction rating for you and your partner's past treatment, rated from 1-10? (Please mark  one)

Not at all satisfied Very Satisfied

1    2    3    4    5    6    7    8    9    10

Prefer not to answer

**L. Demographic Information**

(L-01) What is your marital status? (Please mark  one)

Never married    Married    Widow    Divorced    Prefer not to answer

(L-02) In what month and year did you marry? |\_\_|\_|\_| / |\_\_|\_|\_|\_|\_|

Prefer not to answer   **Month** / **Year**

*(example: Mar / 1985)*

(L-03) Is this your first marriage?

Yes    No    Prefer not to answer

(L-04) If you answered **no** to L-03: What date was your first marriage?

Prefer not to answer   |\_\_|\_|\_| / |\_\_|\_|\_|\_|\_|

**Month** / **Year**

*(example: Mar / 1985)*

(L-05) What is the highest level of education you have had? Please mark  one.

Did not complete high school    Graduated from high school

Some college/vocational school    Graduated from college

Attended graduate school

Prefer not to answer

(L-06) What is your race? Please mark  all that apply.

African American    American Indian/Alaskan Native    Asian

Hawaiian Native/Pacific Islander    White

Other, please specify: \_\_\_\_\_

Prefer not to answer

(L-07) Are you Hispanic/Latino?

Yes    No    Prefer not to answer

(L-08) In what country were you born?

---

(L-09) In what country was your mother born?

---

(L-10) In what country was your father born?

---

(L-11) Do you speak any language fluently other than English?



Fertility Experiences Written Questionnaire

Yes       No       Prefer not to answer

→If **no**, please skip to question L-06 below

(L-12) Which language(s)?

\_\_\_\_\_  
\_\_\_\_\_  
\_\_\_\_\_

(L-13) Which language do you speak best?

\_\_\_\_\_

(L-14) Which language do you write best?

\_\_\_\_\_

(L-15) What language is mainly spoken in your home?

\_\_\_\_\_

(L-16) What is your religious preference? Please mark  one.

- Catholic       Islamic       Jewish       Latter-day Saint       Orthodox Christian  
 Other Christian       Unitarian       Hindu       Buddhist  
 None       Other, please specify: \_\_\_\_\_  
 Prefer not to answer

(L-17) About how often do you usually attend religious or worship services? Please mark  one.

- More than once per week       Weekly       Monthly       Less than monthly       Never  
 Prefer not to answer

(L-18) What is your current occupation? Please mark  all that apply

- Professional       Technical       Clerical/Sales       Skilled laborer       Unskilled laborer  
 Homemaker       Student       Educator  
 Other, please specify: \_\_\_\_\_  
 Prefer not to answer

(L-19) Please mark the choice that most closely approximates your yearly total household income. Please mark  one.

- Under \$12,000       \$12,001-25,000       \$25,001-50,000       \$50,001-75,000  
 \$75,001-100,000       Over \$100,00       Prefer not to answer

(L-20) Do you keep any written records or summaries of your fertility experiences?

- Yes       No       Prefer not to answer

(L-21) Please provide a telephone number where we may reach you. \_\_\_\_\_

(L-22) Please provide an e-mail address where we may contact you.

(L-23) What days would be best to contact you by phone? Please mark  all that apply

- Monday       Tuesday       Wednesday       Thursday  
 Friday       Saturday       Sunday

(L-24) What times would be best to contact you by phone? Please mark  all that apply

- Mornings (9am-12pm)       Afternoons (12pm-5pm)       Evenings (5pm-9pm)       Other

**O: Friends and Family with Infertility**

(O-01) Do you have any friends and/or family members who have been diagnosed with infertility?

- Yes       No

→If **no**, please end survey

(O-02) How many of your friends and/or family members have been diagnosed with infertility? \_\_\_\_\_ (number)

Fertility Experiences Written Questionnaire

(O-03) Have any of your friends and/or family members ever received treatment for infertility?

Yes       No

→ If **no**, please end survey

(O-04) How many of your friends and/or family members have received treatment for infertility? \_\_\_\_\_ (number)

See below for a list of different treatments for infertility. For each treatment, please mark whether you have a friend of family member who has used the treatment and whether they were successful or unsuccessful at getting pregnant while using the treatment. If more than one family member has used the treatment, you may check the boxes in multiple columns.

| Type of Treatment                                                             | A friend or family member used this type of treatment to become pregnant | A friend or family member used this type of treatment but did not become pregnant | None of my friends or family members have used this type of treatment | I don't know if my friends or family members have used this type of treatment |
|-------------------------------------------------------------------------------|--------------------------------------------------------------------------|-----------------------------------------------------------------------------------|-----------------------------------------------------------------------|-------------------------------------------------------------------------------|
| Taking their basal body temperature                                           |                                                                          |                                                                                   |                                                                       |                                                                               |
| Using urine LH test kits (urine ovulation test kits)                          |                                                                          |                                                                                   |                                                                       |                                                                               |
| Taking herbs to enhance fertility                                             |                                                                          |                                                                                   |                                                                       |                                                                               |
| Taking vitamins to enhance fertility                                          |                                                                          |                                                                                   |                                                                       |                                                                               |
| Used acupuncture to enhance fertility                                         |                                                                          |                                                                                   |                                                                       |                                                                               |
| Losing weight to enhance fertility                                            |                                                                          |                                                                                   |                                                                       |                                                                               |
| Adhering to any "fertility" diets                                             |                                                                          |                                                                                   |                                                                       |                                                                               |
| Monitoring vaginal discharge, cervical mucus, or cervical fluids              |                                                                          |                                                                                   |                                                                       |                                                                               |
| Taking pills to enhance fertility or ovulation, such as clomiphene ("clomid") |                                                                          |                                                                                   |                                                                       |                                                                               |
| Taking shots to enhance fertility or ovulation                                |                                                                          |                                                                                   |                                                                       |                                                                               |
| Artificial insemination                                                       |                                                                          |                                                                                   |                                                                       |                                                                               |
| In vitro fertilization (IVF) with or without ICSI                             |                                                                          |                                                                                   |                                                                       |                                                                               |
| Other types of treatment                                                      |                                                                          |                                                                                   |                                                                       |                                                                               |

**Thank you for your participation in this important study!**

Fertility Experiences Telephone Questionnaire

**Telephone interview portion of Fertility Experiences Questionnaire**

Conducted after completion of the written portion.

*Before starting the interview, review Section D of the written questionnaire, as it pertains to what you will ask her during the interview. Her prior answers from Section D are reproduced below. When you verify these questions, enter the new answer given in the interview, even if it differs from the answer given previously in the written questionnaire.*

**Some of the questions we discuss today will be duplicating what we asked you on the written portion of the survey. We hope to confirm your answers and add important details. Please bear with us through this process— your answers to these questions are extremely important for the study.**

**Do you have any questions about the definition of “attempts to conceive” that we are using for this interview?**

*If she asks how long an attempt to conceive needs to be to qualify, the general guideline is a month or more.*

*See separate list of special cases that are considered pregnancies and may or may not be considered “attempts to conceive.”*

**I would now like to briefly go over some of the items you wrote down in the questionnaire to ensure accuracy.**

(D-01) Counting all pregnancies at all times in your life, regardless of the outcome, you have been pregnant \_\_\_\_\_ times. Is this correct?

→ *If she has never been pregnant, please skip to “Attempt to Conceive.”*

(D-02) \_\_\_\_\_ pregnancies resulted from attempts to conceive as previously defined. Is this correct?

(D-03) \_\_\_\_\_ pregnancies resulted when you were using a method to prevent pregnancy. This includes any method, regardless of how consistently it was used.

(D-04) You did/did not have any pregnancies that did not fit into any of the above categories.

If yes, please explain: \_\_\_\_\_

*Clarify these and figure out which ones are actually best classified as “attempts to conceive” and which ones are best classified as pregnancies while trying to avoid. See separate list of special cases that are considered pregnancies and may or may not be considered “attempts to conceive.” Throughout section M of the interview, refer to the following*

(D-06)

|                                      |                                                                                                                                                                                                        |                                    |                                                                                                | Answer These Columns<br>if “Attempt” Ended in Pregnancy                                                                                                                              |                                        |                                                     |  |
|--------------------------------------|--------------------------------------------------------------------------------------------------------------------------------------------------------------------------------------------------------|------------------------------------|------------------------------------------------------------------------------------------------|--------------------------------------------------------------------------------------------------------------------------------------------------------------------------------------|----------------------------------------|-----------------------------------------------------|--|
| “Attempt”<br>Begin Date<br>(mm/yyyy) | How “attempt”<br>ended:<br>1: Pregnancy<br>2: Started Method<br>to Avoid<br>Pregnancy<br>3: Illness<br>4: Separation or<br>Living Apart<br>5: Divorce<br>6: Abstaining<br>7: Currently Still<br>Trying | “Attempt” End<br>Date<br>(mm/yyyy) | Date Pregnancy<br>Ended<br>(mm/yyyy)<br>If currently still<br>pregnant,<br>please enter<br>888 | Pregnancy<br>Outcome:<br>1: Live Birth<br>2: Miscarriage<br>3: Ectopic<br>Pregnancy<br>4: Stillbirth<br>5: Molar Pregnancy<br>6: Termination<br>7: Currently<br>pregnant<br>8: Other | Name of<br>Baby (if<br>applicabl<br>e) | State<br>Where Birth<br>Occurred (if<br>applicable) |  |
| 1                                    |                                                                                                                                                                                                        |                                    |                                                                                                |                                                                                                                                                                                      |                                        |                                                     |  |
| 2                                    |                                                                                                                                                                                                        |                                    |                                                                                                |                                                                                                                                                                                      |                                        |                                                     |  |
| 3                                    |                                                                                                                                                                                                        |                                    |                                                                                                |                                                                                                                                                                                      |                                        |                                                     |  |
| 4                                    |                                                                                                                                                                                                        |                                    |                                                                                                |                                                                                                                                                                                      |                                        |                                                     |  |
| 5                                    |                                                                                                                                                                                                        |                                    |                                                                                                |                                                                                                                                                                                      |                                        |                                                     |  |

Fertility Experiences Telephone Questionnaire

**Section M: Attempt to Conceive**

I will now ask you a set of questions about each of your “attempts to conceive.”

Attempt # \_\_\_\_\_

(M-01) You said you started this attempt in \_\_\_\_\_ and ended in \_\_\_\_\_, so this attempt lasted for \_\_\_\_\_ years and \_\_\_\_\_ months. Is this correct?  Still currently attempting to conceive

(M-02) Was this attempt with your *current* partner?  
 Yes  No  Don't currently have a partner

(M-03) How did this attempt begin?  
 you began to have sexual intercourse and did not use any method to prevent pregnancy  
 you were already having sexual intercourse, and you stopped using any method to prevent pregnancy  
 you started having sex again after a pregnancy ended and were not using any method to prevent pregnancy  
 Other: \_\_\_\_\_

(M-04) What was the average frequency of intercourse during this period  
*Don't say options aloud; please mark  one*  
 <1 time a week  1-2 times a week  >2 times a week

**Feelings and desires about conceiving may change with time. The next question is about your feelings over this particular “attempt to conceive.”**

(M-05) On a scale of 0-10, how much did you want to get pregnant during this “attempt to conceive?” 0 means you did not want to conceive, 5 means that you did not care either way if you conceived, and 10 means that you wanted to conceive very much. (*Circle one number*)

0-----1-----2-----3-----4-----5-----6-----7-----8-----9-----10  
 Did not want Did not care either way Wanted it very much

If your feelings and desires about getting pregnant changed throughout the course of this attempt:  
 What were they at the beginning of this attempt? \_\_\_\_\_ (Number 0-10)  
 What were they at the middle of this attempt? \_\_\_\_\_ (Number 0-10)  
 What were they towards the end of this attempt (or currently, if still attempting?) \_\_\_\_\_ (Number 0-10)

(M-06) On a scale of 0-10, how much do you think your partner wanted you to get pregnant during this “attempt to conceive?” 0 means your partner did not want you to conceive, 5 means that your partner did not care either way if you conceived, and 10 means that your partner wanted you to conceive very much. (*Circle one number*)

0-----1-----2-----3-----4-----5-----6-----7-----8-----9-----10  
 Did not want Did not care either way Wanted it very much

If your partner's feelings and desires about getting pregnant changed throughout the course of this attempt:  
 What were they at the beginning of this attempt? \_\_\_\_\_ (Number 0-10)  
 What were they at the middle of this attempt? \_\_\_\_\_ (Number 0-10)  
 What were they towards the end of this attempt (or currently, if still attempting?) \_\_\_\_\_ (Number 0-10)

(M-07) Was there a point during this attempt where you “actively” started trying to get pregnant?  
 Yes  No

*If yes:* What date did you actively start trying during this attempt?  
 \_\_\_\_\_ / \_\_\_\_\_ / \_\_\_\_\_ (example: Mar / 1985)  
Month / Year

(M-08) During this period, did you see a doctor or provider specifically for fertility-related issues? (Please mark  one)  
 Yes  No  Unsure

Fertility Experiences Telephone Questionnaire

→ If **no**, please skip to question M-11.

(M-09) Did you meet/consult with (Check **all that apply**):

- A general physician/provider (obstetrician, family medicine physician, physician assistant, nurse midwife, or nurse practitioner)?
- A fertility specialist?
- An alternative/holistic practitioner (chiropractor, acupuncturist, naturopath, etc.)
- Other, please describe: \_\_\_\_\_

(M-10) Did you have health insurance at that time that covered any of the following (check all that apply)?

- Tests to diagnose fertility problems in you
- Tests to diagnose fertility problems in your partner
- Treatment for fertility other than IVF/ART
- IVF/ART treatment
- Unsure
- Other, please describe \_\_\_\_\_

(M-11) How long had you been “attempting to conceive” when you first met with a doctor or provider?

\_\_\_\_\_ years and \_\_\_\_\_ months

(M-12) Did this attempt end in a pregnancy (regardless of the pregnancy outcome)?

- Yes  No

→ If **no**, skip to M-14

(M-13) When was the date conception occurred?

Please tell us much as you know.

[Enter as much of the date as they are able to give. This should correspond to the end date for this attempt. Clarify as needed.]

\_\_\_\_|\_\_\_\_|/\_\_\_\_|\_\_\_\_|\_\_\_\_|/\_\_\_\_|\_\_\_\_|\_\_\_\_|\_\_\_\_| (example: 12 Mar 1985)  
DAY MONTH YEAR

Unsure

The following questions ask about things you may have done to enhance fertility during this attempt to conceive, either on recommendation of a doctor, or on your own.

In order to conceive, have you done any of the following:

| Question                                                                         | During this particular attempt?                                                          | How much? Insert this column between attempt and month                                                                   | In the month you got pregnant, if there was a pregnancy (mark <input checked="" type="checkbox"/> if yes) | Comments |
|----------------------------------------------------------------------------------|------------------------------------------------------------------------------------------|--------------------------------------------------------------------------------------------------------------------------|-----------------------------------------------------------------------------------------------------------|----------|
| (M-14) Timed intercourse by counting the number of days in your menstrual cycle? | <input type="checkbox"/> Yes <input type="checkbox"/> No <input type="checkbox"/> Unsure | # cycles/months:<br>_____<br>or<br><input type="checkbox"/> During the entire attempt<br><input type="checkbox"/> Unsure | <input type="checkbox"/>                                                                                  |          |
| (M-15) Taken your basal body temperature?                                        | <input type="checkbox"/> Yes <input type="checkbox"/> No <input type="checkbox"/> Unsure | # cycles/months:<br>_____<br>or<br><input type="checkbox"/> During the entire attempt                                    | <input type="checkbox"/>                                                                                  |          |

Fertility Experiences Telephone Questionnaire

|                                                              |                                                                                          |                                                                                                                                  |
|--------------------------------------------------------------|------------------------------------------------------------------------------------------|----------------------------------------------------------------------------------------------------------------------------------|
|                                                              |                                                                                          | <input type="checkbox"/> Unsure                                                                                                  |
| (M-16) Used urine LH test kits (urine ovulation test kits)?  | <input type="checkbox"/> Yes <input type="checkbox"/> No <input type="checkbox"/> Unsure | # cycles/months: _____<br>or<br><input type="checkbox"/> During the entire attempt<br><input type="checkbox"/> Unsure            |
| (M-17) Taken herbs intended to enhance fertility?            | <input type="checkbox"/> Yes <input type="checkbox"/> No <input type="checkbox"/> Unsure | # cycles/months: _____ What kind?<br>or<br><input type="checkbox"/> During the entire attempt<br><input type="checkbox"/> Unsure |
| (M-18) Partner taken herbs intended to enhance fertility?    | <input type="checkbox"/> Yes <input type="checkbox"/> No <input type="checkbox"/> Unsure | # cycles/months: _____ What kind?<br>or<br><input type="checkbox"/> During the entire attempt<br><input type="checkbox"/> Unsure |
| (M-19) Taken vitamins intended to enhance fertility?         | <input type="checkbox"/> Yes <input type="checkbox"/> No <input type="checkbox"/> Unsure | # cycles/months: _____ What kind?<br>or<br><input type="checkbox"/> During the entire attempt<br><input type="checkbox"/> Unsure |
| (M-20) Partner taken vitamins intended to enhance fertility? | <input type="checkbox"/> Yes <input type="checkbox"/> No <input type="checkbox"/> Unsure | # cycles/months: _____ What kind?<br>or<br><input type="checkbox"/> During the entire attempt<br><input type="checkbox"/> Unsure |
| (M-21) Taken any "supplements" to enhance fertility?         | <input type="checkbox"/> Yes <input type="checkbox"/> No <input type="checkbox"/> Unsure | # cycles/months: _____ What kind?<br>or<br><input type="checkbox"/> During the entire attempt<br><input type="checkbox"/> Unsure |
| (M-22) Partner taken any "supplements" to enhance fertility? | <input type="checkbox"/> Yes <input type="checkbox"/> No <input type="checkbox"/> Unsure | # cycles/months: _____ What kind?<br>or<br><input type="checkbox"/> During the entire attempt<br><input type="checkbox"/> Unsure |
| (M-23) Used acupuncture to enhance fertility?                | <input type="checkbox"/> Yes <input type="checkbox"/> No <input type="checkbox"/> Unsure | # cycles/months: _____<br>or<br><input type="checkbox"/> During the entire attempt<br><input type="checkbox"/> Unsure            |
| (M-24) Partner used acupuncture to enhance fertility?        | <input type="checkbox"/> Yes <input type="checkbox"/> No <input type="checkbox"/> Unsure | # cycles/months: _____<br>or<br><input type="checkbox"/> During the entire attempt<br><input type="checkbox"/> Unsure            |

Fertility Experiences Telephone Questionnaire

|                                                                                                             |                                                                                          |                          |                                                                                                                                                                                            |
|-------------------------------------------------------------------------------------------------------------|------------------------------------------------------------------------------------------|--------------------------|--------------------------------------------------------------------------------------------------------------------------------------------------------------------------------------------|
| (M-25) Lost weight to enhance fertility?                                                                    | <input type="checkbox"/> Yes <input type="checkbox"/> No <input type="checkbox"/> Unsure | <input type="checkbox"/> | Starting wt: _____<br>Ending wt: _____                                                                                                                                                     |
| (M-26) Partner lost weight to enhance fertility?                                                            | <input type="checkbox"/> Yes <input type="checkbox"/> No <input type="checkbox"/> Unsure | <input type="checkbox"/> | Starting wt: _____<br>Ending wt: _____                                                                                                                                                     |
| (M-27) Adhered to any "fertility" diets?                                                                    | <input type="checkbox"/> Yes <input type="checkbox"/> No <input type="checkbox"/> Unsure | <input type="checkbox"/> | # cycles/months: _____<br>or<br><input type="checkbox"/> During the entire attempt<br><input type="checkbox"/> Unsure<br>What kind?                                                        |
| (M-28) Partner adhered to any "fertility" diets?                                                            | <input type="checkbox"/> Yes <input type="checkbox"/> No <input type="checkbox"/> Unsure | <input type="checkbox"/> | # cycles/months: _____<br>or<br><input type="checkbox"/> During the entire attempt<br><input type="checkbox"/> Unsure<br>What kind?                                                        |
| (M-29) Monitored vaginal discharge, cervical mucus, or cervical fluid?                                      | <input type="checkbox"/> Yes <input type="checkbox"/> No <input type="checkbox"/> Unsure | <input type="checkbox"/> | # cycles/months: _____<br>or<br><input type="checkbox"/> During the entire attempt<br><input type="checkbox"/> Unsure<br>Where did you learn about how to monitor cervical mucus or fluid? |
| (M-30) Taken any other drug every day to help you ovulate, such as metformin, glucophage, actos, or others? | <input type="checkbox"/> Yes <input type="checkbox"/> No <input type="checkbox"/> Unsure | <input type="checkbox"/> | # cycles/months: _____<br>or<br><input type="checkbox"/> During the entire attempt<br><input type="checkbox"/> Unsure                                                                      |
| (M-31) Taken pills to enhance fertility or ovulation, such as clomiphene ("clomid")?                        | <input type="checkbox"/> Yes <input type="checkbox"/> No <input type="checkbox"/> Unsure | <input type="checkbox"/> | # cycles/months: _____<br>or<br><input type="checkbox"/> During the entire attempt<br><input type="checkbox"/> Unsure<br>Which medication?                                                 |
| (M-32) Partner taken pills to enhance fertility such as clomiphene ("clomid")?                              | <input type="checkbox"/> Yes <input type="checkbox"/> No <input type="checkbox"/> Unsure | <input type="checkbox"/> | # cycles/months: _____<br>or<br><input type="checkbox"/> During the entire attempt<br><input type="checkbox"/> Unsure<br>Which medication?                                                 |
| (M-33) Taken any hormones to enhance fertility such as progesterone                                         | <input type="checkbox"/> Yes <input type="checkbox"/> No <input type="checkbox"/> Unsure | <input type="checkbox"/> | # cycles/months: _____<br>or<br><input type="checkbox"/> During the entire attempt<br><input type="checkbox"/> Unsure<br>Which medication?                                                 |
| (M-34) Partner taken any hormones to enhance fertility, energy, or sexuality such as testosterone?          | <input type="checkbox"/> Yes <input type="checkbox"/> No <input type="checkbox"/> Unsure | <input type="checkbox"/> | # cycles/months: _____<br>or<br><input type="checkbox"/> During the entire attempt<br><input type="checkbox"/> Unsure<br>Which medication?                                                 |
| (M-35) Taken shots to enhance fertility or ovulation?                                                       | <input type="checkbox"/> Yes <input type="checkbox"/> No <input type="checkbox"/> Unsure | <input type="checkbox"/> | # cycles/months: _____<br>or<br><input type="checkbox"/> During the<br>Which medication?                                                                                                   |

Fertility Experiences Telephone Questionnaire

|                                                               |                                                                                          |                                                                                                                           |
|---------------------------------------------------------------|------------------------------------------------------------------------------------------|---------------------------------------------------------------------------------------------------------------------------|
|                                                               |                                                                                          | entire attempt<br><input type="checkbox"/> Unsure                                                                         |
| (M-36) Had artificial insemination?                           | <input type="checkbox"/> Yes <input type="checkbox"/> No <input type="checkbox"/> Unsure | # cycles/months:<br>or<br><input type="checkbox"/> During the entire attempt<br><input type="checkbox"/> Unsure           |
| (M-37) Had in vitro fertilization (IVF) with or without ICSI? | <input type="checkbox"/> Yes <input type="checkbox"/> No <input type="checkbox"/> Unsure | # cycles/months:<br>or<br><input type="checkbox"/> During the entire attempt<br><input type="checkbox"/> Unsure           |
| (M-38) Other?                                                 | <input type="checkbox"/> Yes <input type="checkbox"/> No <input type="checkbox"/> Unsure | # cycles/months: Describe?<br>or<br><input type="checkbox"/> During the entire attempt<br><input type="checkbox"/> Unsure |

(M-39) If patient answered yes to AI or IVF please ask: did you use any donor egg or sperm?  Yes  No

If yes:

(M-40) While doing artificial insemination, did you ever use donor sperm during this attempt?  Yes  No

(M-41) If yes, did you use donor sperm during the cycle that you got pregnant?  Yes  No

(M-42) While doing IVF did you use donor sperm?  Yes  No

(M-43) If yes, did you use donor sperm during the cycle that you got pregnant?  Yes  No

(M-44) While doing IVF did you use donor eggs?  Yes  No

(M-45) If yes, did you use donor eggs during the cycle that you got pregnant?  Yes  No

(M-46) If she has answered that she has tried ovulation-enhancing drugs, insemination, and/or IVF, please ask: Can you please expand on the reasons why you chose to pursue (ovulation-enhancing drugs, insemination, and/or IVF)?

---



---



---

If this attempt resulted in a pregnancy, skip to M-49

(M-47) How did this attempt end?

- Birth Control, Personal     Birth Control, Medical     Divorce/Separation     Illness  
 Abstaining     Still Attempting

(M-48) When did this attempt end?

\_\_\_\_|\_\_\_\_|\_\_\_\_/\_\_\_\_|\_\_\_\_|\_\_\_\_|\_\_\_\_ (example: Mar / 2005)     Still currently attempting to conceive  
Day    Month    /    Year

→ Skip to END of Section M.



Fertility Experiences Telephone Questionnaire

(M-49) When did this pregnancy end?

\_\_\_\_/\_\_\_\_/\_\_\_\_ (example: 12 Mar 1985)  
**DAY MONTH YEAR**

Unsure

(M-50) How far along were you when this pregnancy ended in weeks? (For example 12 weeks gestation, 39 weeks gestation, etc.)

\_\_\_\_\_ weeks gestation

(M-51) How many fetuses or babies were in this pregnancy?

Don't read options aloud; please mark  one

- One       Twins       Triplets       More than Triplets  
 Unknown

(M-52) How did this pregnancy end?

Don't read options aloud; please mark  one

- Live birth       Miscarriage       Ectopic pregnancy  
 Stillbirth       Molar pregnancy       Termination  
 Other, describe: \_\_\_\_\_

→If the outcome was **not a live birth**, skip to enter her next "attempt to conceive." If this is her last "attempt to conceive," then skip to Section N. Miscarriage is a pregnancy loss up to 20 weeks; stillbirth is a pregnancy loss after 20 weeks gestation.

(M-53) What was (were) the baby's(ies') name(s), sex and birth weight?

|        | First (given name) | Middle | Last (surname) | Birth weight (pounds/ounces or grams) | Sex                                                           | Hospital stay of 7 days or more                                                                |
|--------|--------------------|--------|----------------|---------------------------------------|---------------------------------------------------------------|------------------------------------------------------------------------------------------------|
| Baby 1 |                    |        |                |                                       | <input type="checkbox"/> Male <input type="checkbox"/> Female | <input type="checkbox"/> Yes<br><input type="checkbox"/> No<br><input type="checkbox"/> Unsure |
| Baby 2 |                    |        |                |                                       | <input type="checkbox"/> Male <input type="checkbox"/> Female | <input type="checkbox"/> Yes<br><input type="checkbox"/> No<br><input type="checkbox"/> Unsure |
| Baby 3 |                    |        |                |                                       | <input type="checkbox"/> Male <input type="checkbox"/> Female | <input type="checkbox"/> Yes<br><input type="checkbox"/> No<br><input type="checkbox"/> Unsure |

(M-54) Did you ever breastfed this/these baby(ies)?

Yes     No

(M-55) How long did you breastfed this/these baby(ies)? (in months)

\_\_\_\_\_ months

If there were multiple babies with different answers, record the answer for the baby with the **longest** time breastfeeding.

(M-56) How old was/were this baby(ies) when (s)he first ate something other than breastmilk or water?

\_\_\_\_\_ months

If there were multiple babies with different answers, record the answer for the **last** baby to have something besides breastmilk or water.

**END: Recheck to see if all attempt and pregnancy dates are concordant with each other. If she had a pregnancy, review the date the pregnancy ended and how far along she was when the pregnancy ended. If she did not have a pregnancy, review the date the attempt ended. Go over with her again if there is a discrepancy of 2 months or more. Skip to enter her next "attempt to conceive." If this is her last "attempt to conceive," then skip to Section N.**



Fertility Experiences Telephone Questionnaire

|        | First (given name) | Middle | Last (surname) | Birth weight (pounds/ounces or grams) | Sex                                                           | Hospital stay of 7 days or more                                                                |
|--------|--------------------|--------|----------------|---------------------------------------|---------------------------------------------------------------|------------------------------------------------------------------------------------------------|
| Baby 1 |                    |        |                |                                       | <input type="checkbox"/> Male <input type="checkbox"/> Female | <input type="checkbox"/> Yes<br><input type="checkbox"/> No<br><input type="checkbox"/> Unsure |
| Baby 2 |                    |        |                |                                       | <input type="checkbox"/> Male <input type="checkbox"/> Female | <input type="checkbox"/> Yes<br><input type="checkbox"/> No<br><input type="checkbox"/> Unsure |
| Baby 3 |                    |        |                |                                       | <input type="checkbox"/> Male <input type="checkbox"/> Female | <input type="checkbox"/> Yes<br><input type="checkbox"/> No<br><input type="checkbox"/> Unsure |

(N-09) Did you ever breastfed this/these baby(ies)?

Yes  No

(N-10) How long did you breastfed this/these baby(ies)? (in months)

\_\_\_\_\_ months

*If there were multiple babies with different answers, record the answer for the baby with the **longest** time breastfeeding.*

(N-11) How old was/were this baby(ies) when (s)he first ate something other than breastmilk or water?

\_\_\_\_\_ months

*If there were multiple babies with different answers, record the answer for the **last** baby to have something besides breastmilk or water.*

*If this is her last event that happened while avoiding pregnancy, skip to section P.*

Fertility Experiences Telephone Questionnaire

**SECTION P**

Finally, I have a few questions about participating in studies of treatment for infertility. Your answers to these questions may help us design future studies. To answer these questions, please look back to the time that you first were considering treatment for infertility.

*If she objects that she never considered treatment, then ask her to look back to the time that she first realized she was having difficulty getting pregnant, or at least 6 months from when she didn't get pregnant despite regular intercourse without contraception.*

(P-1) At that time, would you have been willing to participate in a research study that involved receiving fertility treatment, at no cost to you?

- Yes                       Maybe                       No

*If YES or MAYBE, proceed to Q P-3.*

(P-2) (If NO to Q P-1) Can you tell my why you would not have wanted to participate in a study of fertility treatments?

---

---

---

(P-3) Under which of the following conditions would you have been willing to participate in a study involving fertility treatment? (Note all that apply)

- a. If one of the treatments you might receive would have been advice regarding lifestyle
    - i. If no, please explain why
  - b. If one of the treatments you might have received would have been education about the most fertile days of your menstrual cycle, in order to learn what days you are most likely to get pregnant?
  - c. If one of the treatments you might have received had included alternative treatments such as herbs or acupuncture?
  - d. If one of the treatments you might have received had included medical intervention, such as medication, to increase the chances of pregnancy from natural intercourse?
  - e. If one of the treatments you might have received would have been artificial insemination?
  - f. If one of the treatments you might have received would have been in vitro fertilization (IVF)?
2. In a randomized study, participants do not choose their individual treatments and the type of treatment received is entirely left up to chance. Would you have been willing to participate in a randomized research study on two different fertility treatments, where which treatment you got was determined entirely by chance?
- a. If NO: Can you tell me why you would not have wanted to participate in a **randomized** study of two different fertility treatments (or why you would be unsure about participating in a **randomized** study of two different fertility treatments?)

---

---

**END HERE**

- b. IF yes or maybe, proceed to question 3
3. Which of the following would have increased the likelihood of your participation in a **randomized** study of two different fertility treatments?
- a. Getting free treatment

- b. The possibility of receiving more involved treatment after participating in the study for some time [if necessary, clarify that “more involved” means more medications, procedures and interventions]
  - i. As part of a study, **how long** would you have been willing to receive less involved treatment before moving on to more involved treatment?
- c. Getting paid for participation in addition to the treatment received
- d. Is there anything else that would have increased your likelihood of participation in a randomized study of two different fertility treatments?

---

---

---

- 4. How long would you have been willing to participate in a **randomized** study of fertility treatment?
  - a. Clarify response in terms of months and years
- 5. Finally, would you participate in a randomized study of two different fertility treatments if you had to pay for the treatments yourself?
- 6. Do you have any other comments about participating in randomized studies of fertility treatments?

---

---

---

**SECTION Q: Other Sources of Information**

(Q-01) For the written questionnaire or this interview, did you review any copies of medical records from doctors?  
 Yes       No

(Q-02) For the written questionnaire or this interview, did you review any of your own summaries, diaries, calendars, or journals about your fertility experiences?  
 Yes       No

**SECTION R: Future Studies**

R-01: May we contact you in the future for additional information regarding your fertility experiences?  
 Yes       No
